# Supplementary material for: Tension Monitoring during Epithelial-to-Mesenchymal Transition Links the Switch of Phenotype to Expression of Moesin and Cadherins in NMuMG Cells
Source: PubMed Central journal article supplement (PMC3855076; doi:10.1371/journal.pone.0080068), 2013-12-05
Supplement: pone.0080068.s002.pdf [file pone.0080068.s002.pdf]

**Table S1**

|                               | $G_0 / \text{Pa}$ | $\alpha$ | $\mu / \text{Pa s}$ |
|-------------------------------|-------------------|----------|---------------------|
| epithelial state              | 3996              | 0.16     | 12                  |
| transitional state            | 6178              | 0.03     | 12                  |
| <i>mesenchymal-like</i> state | 12439             | 0.06     | 23                  |
