# Supplementary material for: Tension Monitoring during Epithelial-to-Mesenchymal Transition Links the Switch of Phenotype to Expression of Moesin and Cadherins in NMuMG Cells
Source: PubMed Central journal article supplement (PMC3855076; doi:10.1371/journal.pone.0080068), 2013-12-05
Supplement: pone.0080068.s003.pdf [file pone.0080068.s003.pdf]

**Table S2**

|                                        | <b>Epith-Epith</b> | <b>Mes-Mes</b>      | <b>E-Cad-Epith</b>  | <b>E-Cad-Epith + Ab</b> |
|----------------------------------------|--------------------|---------------------|---------------------|-------------------------|
| <b>No. of curves used for analysis</b> | 91 of 175<br>(52%) | 148 of 285<br>(52%) | 212 of 615<br>(31%) | 297 of 671<br>(44%)     |
| <b>No. of cells</b>                    | 15                 | 9                   | 6                   | 6                       |
