# Supplementary material for: Tension Monitoring during Epithelial-to-Mesenchymal Transition Links the Switch of Phenotype to Expression of Moesin and Cadherins in NMuMG Cells
Source: PubMed Central journal article supplement (PMC3855076; doi:10.1371/journal.pone.0080068), 2013-12-05

Figure S11

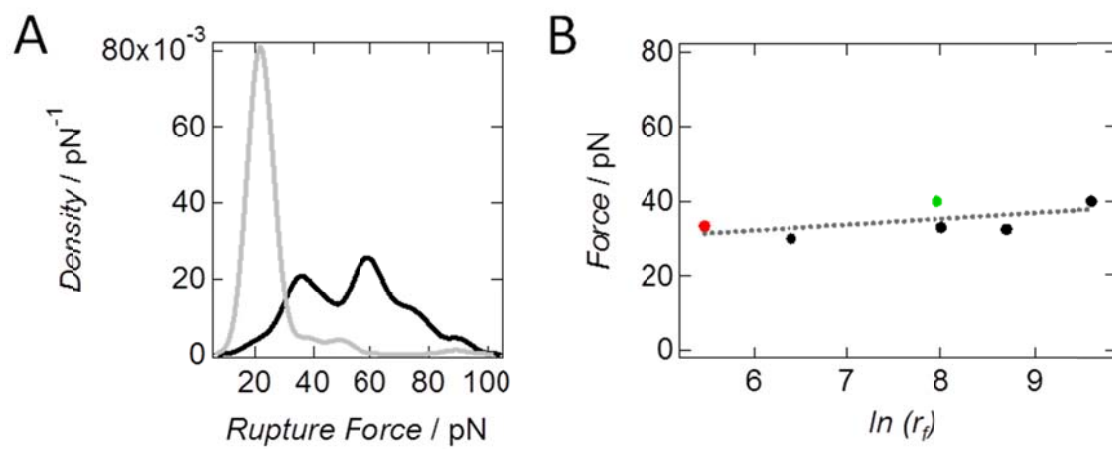

Supplement: pone.0080068.s014.pdf [file pone.0080068.s014.pdf]
